# Supplementary material for: A novel mixture of diethylene glycol diethylether and non-flammable methyl-nonafluorobutyl ether as a safe electrolyte for lithium ion batteries
Source: Royal Society of Chemistry journal article supplement (doi:10.1039/c5ta05242d), 2015-01-01
Supplement: c5ta05242d1.pdf [file c5ta05242d1.pdf]

**Novel mixture of diethylene glycol diethylether and non-flammable methyl-  
nonafluorobutyl ether as safe electrolyte for lithium ion batteries**

Shaohua Fang <sup>a,c\*</sup>, Guojun Wang <sup>a</sup>, Long Qu <sup>a</sup>, Dong Luo <sup>a</sup>, Li Yang <sup>a,b,c\*</sup>, Shin-ichi Hirano <sup>b</sup>

<sup>a</sup> *School of Chemistry and Chemical Engineering, Shanghai Jiao Tong University, Shanghai 200240, China*

<sup>b</sup> *Hirano Institute for Materials Innovation, Shanghai Jiao Tong University, Shanghai 200240, China*

<sup>c</sup> *Shanghai Electrochemical Energy Devices Research Center, Shanghai 200240, China*

**\* Corresponding authors**

Tel: +86 21 54748917.

Fax: +86 21 54741297.

E-mail: housefang@sjtu.edu.cn (S.H. Fang); liyangce@sjtu.edu.cn (L. Yang).

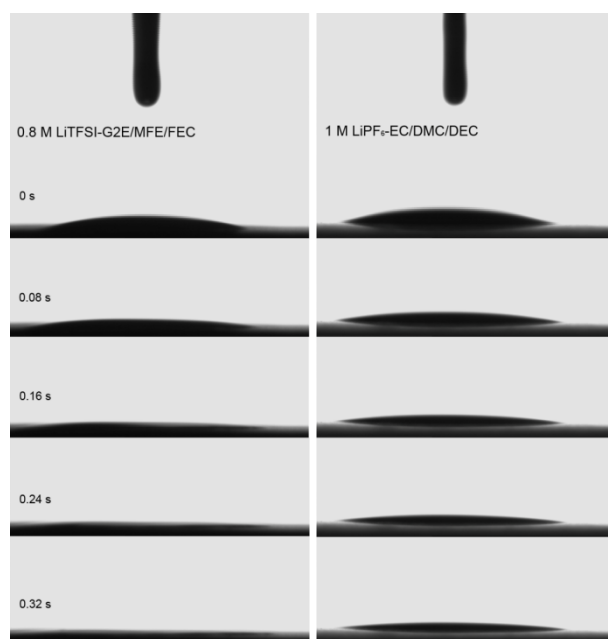

**Fig. S1** Impregnation process of 0.8 M LiTFSI-G2E/MFE/FEC and 1M LiPF<sub>6</sub>-EC/DMC/DEC electrolytes into LiFePO<sub>4</sub> cathode.

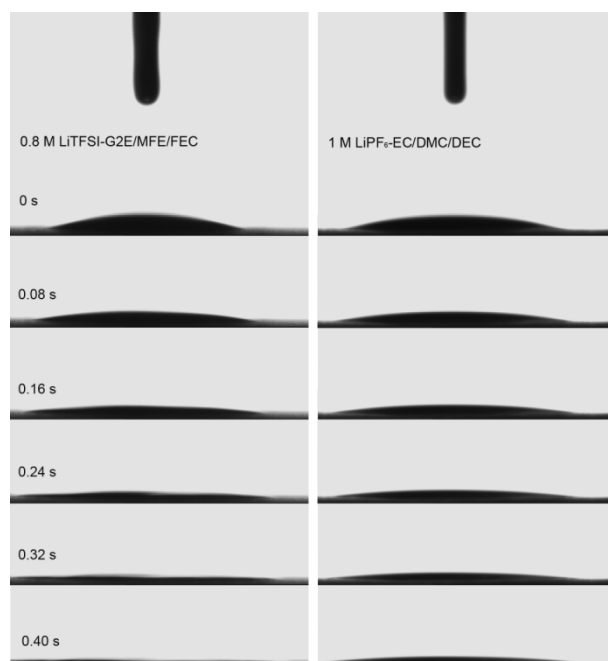

**Fig. S2** Impregnation process of 0.8 M LiTFSI-G2E/MFE/FEC and 1M LiPF<sub>6</sub>-EC/DMC/DEC electrolytes into graphite anode.

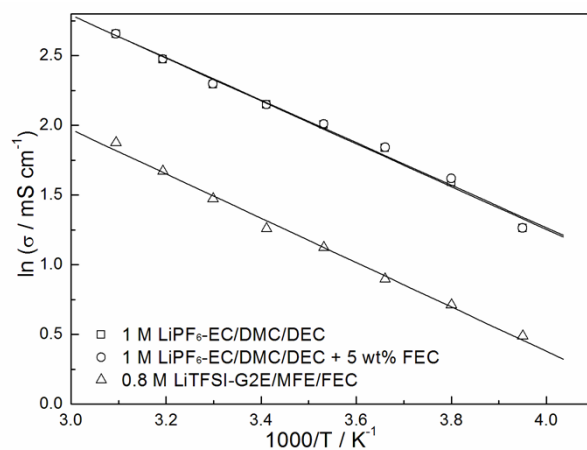

**Fig. S3** Arrhenius plots of conductivity for different electrolytes.

**Table S1** Activation energies  $E_\sigma$ , constants  $A$  and the linear fitting parameters  $R^2$  calculated from the Arrhenius plots of conductivity

| Electrolyte                                   | $E_\sigma / \text{kJ mol}^{-1}$ | $A / \text{mS cm}^{-1}$ | $R^2$ |
|-----------------------------------------------|---------------------------------|-------------------------|-------|
| 0.8 M LiTFSI-G2E/MFE/FEC                      | 13.22                           | 847                     | 0.997 |
| 1 M LiPF <sub>6</sub> -EC/DMC/DEC             | 12.77                           | 1633                    | 0.996 |
| 1 M LiPF <sub>6</sub> -EC/DMC/DEC + 5 wt% FEC | 12.67                           | 1573                    | 0.995 |

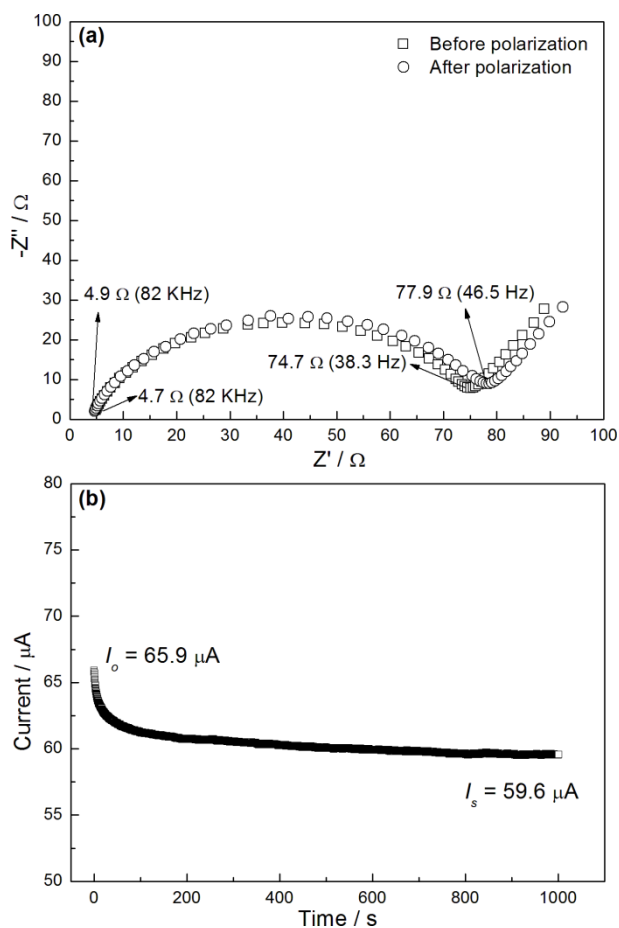

**Fig. S4** (a) EIS plots and (b) time-dependence response of dc polarization of lithium symmetric cell using 0.8 M LiTFSI-G2E/MFE/FEC electrolyte at room temperature. Polarization voltage is 5 mV.

**Table S2** Parameters obtained from EIS and dc polarization analysis of lithium symmetric cell using 0.8 M LiTFSI-G2E/MFE/FEC electrolyte at room temperature

| $R_b^o / \Omega$ | $R_t^o / \Omega$ | $R_b^s / \Omega$ | $R_t^s / \Omega$ | $I_o / \mu\text{A}$ | $I_s / \mu\text{A}$ | $\Delta V / \text{mV}$ |
|------------------|------------------|------------------|------------------|---------------------|---------------------|------------------------|
| 4.9              | 69.8             | 4.7              | 73.2             | 65.9                | 59.6                | 5                      |

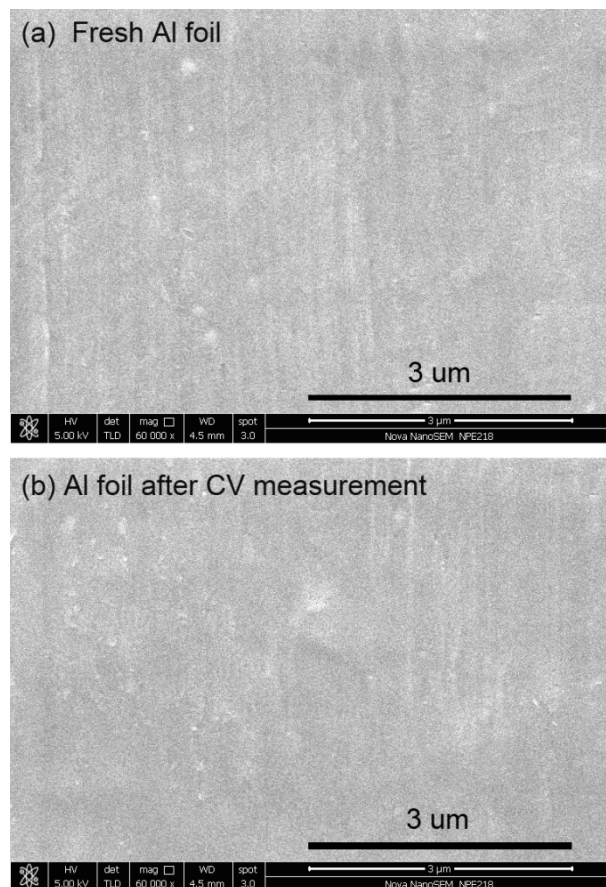

**Fig. S5** SEM images of (a) fresh Al foil and (b) Al foil after CV measurement (in Fig. 6a).

**Table S3** Resistance parameters calculated from the EIS plots (Fig. 7c)

| Electrolyte                                   | $R_b / \Omega$ | $R_{SEI} / \Omega$ | $R_{ct} / \Omega$ |
|-----------------------------------------------|----------------|--------------------|-------------------|
| 0.8 M LiTFSI-G2E/MFE/FEC                      | 4.1            | 57.1               | 15.2              |
| 1 M LiPF <sub>6</sub> -EC/DMC/DEC             | 2.7            | 89.1               | 30.9              |
| 1 M LiPF <sub>6</sub> -EC/DMC/DEC + 5 wt% FEC | 2.8            | 91.8               | 29.4              |
